# Supplementary material for: Microbial Eukaryotes in Natural and Artificial Salt Marsh Pools
Source: MDPI journal article supplement (doi:10.3390/coasts4020015), 2024-04-02
Supplement: s1 [file s1]

Archive with 2 entries (2 files):
- TableS1_FigureS1.pdf
- TableS2.xlsx
