# Supplementary material for: Microbial Eukaryotes in Natural and Artificial Salt Marsh Pools
Source: MDPI journal article supplement (doi:10.3390/coasts4020015), 2024-04-02
Supplement: s1 [file s1 › TableS1_FigureS1.pdf]

# Microbial eukaryotes in natural and artificial salt marsh pools

Marina Potapova, Daiana Markarian, Abigail King & Laura Aycock

## Supplementary Materials

**Table S1.** Location and characteristics of sampled tidal pools.

| Pool ID | Type    | Latitude | Longitude | Depth, m | Turbidity | Salinity, psu | pH   | Temperature, C | Dissolved oxygen, mg L <sup>-1</sup> | Water sample | Sediment samples |
|---------|---------|----------|-----------|----------|-----------|---------------|------|----------------|--------------------------------------|--------------|------------------|
| AN      | Natural | 39.50918 | 74.31481  | 0.43     | moderate  | 30.91         | 7.44 | 21.0           | 4.06                                 | AN1          | AN2 a, c, e      |
| AR      | OMWM    | 39.51981 | 74.29946  | 0.51     | high      | 27.62         | 7.21 | 21.7           | 1.88                                 | AR1          | AR2 a, c, e      |
| BP      | OMWM    | 39.52185 | 74.29932  | 0.26     | moderate  | 29.61         | 7.30 | 21.1           | 4.34                                 | BP1          | BP2 a, c, e      |
| CV      | Natural | 39.50921 | 74.31748  | 0.55     | moderate  | 31.42         | 7.69 | 21.0           | 5.6                                  | CV1          | CV2 a, c, e      |
| DC      | OMWM    | 39.52077 | 74.29932  | 0.47     | high      | 28.1          | 7.00 | 21.1           | 3.5                                  | DC1          | DC2 a, c, e      |
| HT      | Natural | 39.50899 | 74.31639  | 0.15     | moderate  | 31.78         | 7.50 | 21.4           | 2.73                                 | HT1          | HT2 a, c, e      |
| JN      | Natural | 39.50925 | 74.31532  | 0.5      | moderate  | 31.4          | 7.40 | 20.6           | 2.8                                  | JN1          | JN2 a, c, e      |
| MS      | Natural | 39.50924 | 74.31507  | 0.64     | moderate  | 30.61         | 7.24 | 20.4           | 3.88                                 | MS1          | MS2 a, c, e      |
| SB      | Natural | 39.50847 | 74.31517  | 0.4      | moderate  | 31.5          | 7.77 | 21.7           | 6.17                                 | SB1          | SB2 a, c, e      |
| SN      | OMWM    | 39.52106 | 74.29933  | 0.26     | high      | 29.37         | 7.43 | 21.5           | 5.89                                 | SN1          | SN2 a, c, e      |

## Microbial eukaryotes in natural and artificial salt marsh pools

Marina Potapova, Daiana Markarian, Abigail King & Laura Aycock

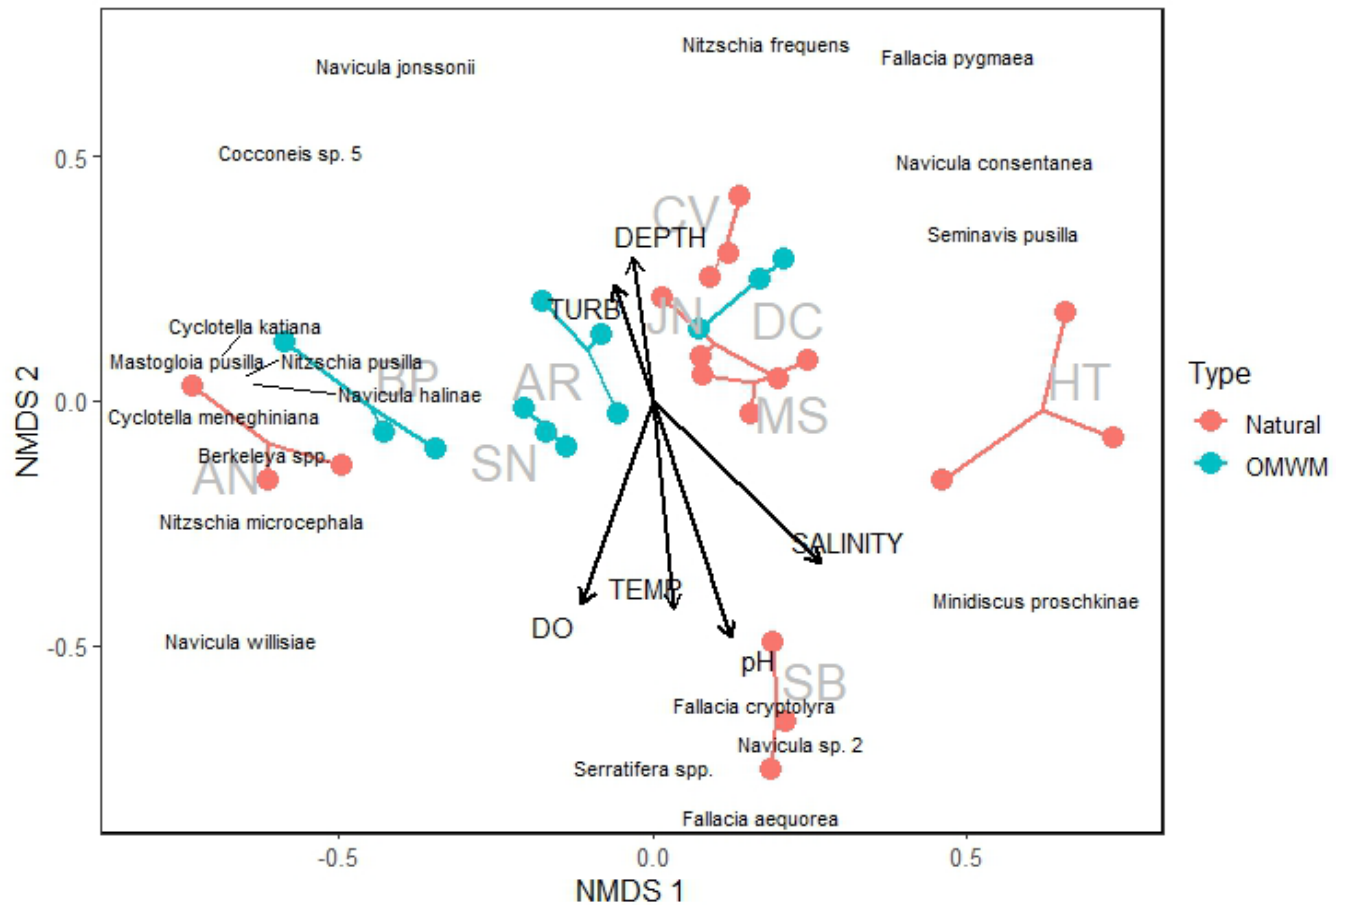

**Figure S1.** NMDS plot, sediment diatom count data. Samples (filled circles) from individual pools are connected by lines that meet at pool centroids. Pool codes are in grey letters. Positions of 20 morphospecies with the highest fit are shown by their labels (black font). Arrows show correlations of environmental variables with ordination axes. DO: dissolved oxygen, TEMP – water temperature, TURB: turbidity.
