# Supplementary material for: Microbial Eukaryotes in Natural and Artificial Salt Marsh Pools
Source: MDPI journal article supplement (doi:10.3390/coasts4020015), 2024-04-02
Supplement: s1 [file s1 › TableS2.xlsx]

## Sheet: Data
Species	AR2a	AR2c	AR2e	BP2a	BP2c	BP2e	DC2a	DC2c	DC2e	AN2a	AN2c	AN2e	CV2a	CV2c	CV2e	HT2a	HT2c	HT2e	JN2a	JN2c	JN2e	MS2a	MS2c	MS2e	SB2a	SB2c	SB2e	SN2a	SN2c	SN2e
Achnanthes brevipes																	2										2		3
Adlafia sp.	2				2		2
Amicula speculum										2						2
Amphicocconeis disculoides					2							2				1			2						1	1
Amphora allanta						2
Amphora cf. laevissima		4		6	9	20	1			12	8	19	14	16	46				14	10	16		2	8				2	11	6
Amphora ocellata																			1
Amphora polita					2	2			1						2						2		2	2
Amphora pseudohyalina	3						1		4	3							2
Amphora pusio					2			2				2	2	4	2		8		4	3	2		7	2	4	10	8			1
Amphora semperpalorum		6	9		2										4		16
Amphora sp. 1																						2
Amphora sp. 2							3			10
Amphora staurophora				19	5	2							3						2			2			3		4	2	2
Amphora sublaevis																				2		3
Anaulus balticus										1																5	5
Anortoneis vortex																									2			2
Astartiella bahusiensis	4	6			2		1		1	2		4		2	2		2			2			6		2		2	2	6	6
Astartiella sp.						2		9	2		6	14			2					10	2		2				2	6	1	2
Bacillaria paxillifer	1		1		2	3			1	1													1			1		1
Berkeleya spp.	44	76	18	5	3	2	7	24	16						2	8	2		4			8	4					5	18
Biddulphia alternans						1
Biremis circumtexta																						6		4
Brachysira microcephala							2
Chaetoceros spp.		2	12	12	9	3	10		1		4		6		10							3	1					6	7
Chamaepinnularia sp.	2
Climacosphenia sp.																			1
Cocconeiopsis sp. 2													1						1
Cocconeis carminata							2
Cocconeis neothumensis var. marina				3		5				17	18	28	68	42	14		2		12	10	12	28	20	38	6
Cocconeis peltoides									1
Cocconeis sp. 1							1
Cocconeis sp. 5	21	21	10	4	20	6	14	12	16	3	11	2	24	21	6	1			11	4		9	7	14				5	6	6
Cocconeis stauroneiformis				1	6	2		2	1	5	7	2	40	42	2	1	2		1	1	1	8	6	6		2
Conticribra guillardii									1		2										7		2	4	2
Conticribra weissflogii					2
Craticula sp. 1						2																								2
Craticulifera crinigera					6								2
Cyclotella atomus		2	4	5	12	41	4	8		8	2			6	16	4	2	4		2	8	6		8	6	6	12		6	10
Cyclotella choctawhatcheeana	2					2			8	6	4	2	2							4	2				4	2	4		2
Cyclotella katiana	10	2	4	15	9	4	6		6																			3		6
Cyclotella litoralis	2	3						1									1		2							2
Cyclotella meneghiniana	1	7	12	10	3	3	24	8	3																			9	2	1
Cyclotella sp. 1										2
Cylindrotheca closterium																2									2
Delphineis minutissima	2			2	6	1	1		2	2	4	6	3			10	1		6	2		2	8		7	4	1			1
Delphineis surirella			2	1			1								1		1		1
Denticula subtilis	9	4	2	12	7	9	5	8	5	8	6	4	12	6	10	20	8	10	10	6	20	12	14	16	6	10		3	6	13
Dimerogramma minus																									12	4	1
Diploneis sp.						1					2								2				2			2
Entomoneis sp.	2	3	4	1				2			2
Envekadea pseudocrassirostris							2		1									2	10			2							1
Eunotogramma dubium					1	2													2						5	6
Fallacia aequorea						2															2				4	18	36		2
Fallacia amphipleuroides																									4		6
Fallacia cryptolyra		1			6	2			2				4					2			2			6	6	26	18	8		10
Fallacia margino-punctata																												2
Fallacia melanocephala													2					2
Fallacia pygmaea				14	12	17		1	1	23	12	22	4	7	12	6	8	12	4	3	7	24	9	14				3	4	2
Fallacia sp. 14				2						12	11	19	3	4	2				5	2	4	6			1	3	8
Fallacia sp. 16											4									4
Fallacia tenera												4		2									2
Fistulifera sp.																6
Fragilaria bronkei					2
Fragilaria gedanensis												6																2
Gedaniella spp.									2
Gomphonemopsis pseudexigua																					2
Gomphoseptatum sp.	2
Grammatophora oceanica															2
Gyrosigma attenuatum				3	2												1
Gyrosigma cf. balticum							1
Gyrosigma fasciola																2	4	4
Gyrosigma prolongatum																									4
Halamphora acutiuscula		2	6	10			1	2	7			1	2	3				1	2			5			1				5	2
Halamphora adumbratoides	10	26	52	4	8	7	11	16	34	8	2	10	11	4	10				3	16	28	14	12	18	16	17	8	12	8	24
Halamphora aponina	2		10	4			1	6	5	11	6	4		8	2		7			2	2		2							1
Halamphora coffeaformis	47	2	18	17	9	6	14		1	8	1	2			5	23	18	12	4	2		4	3	2	2	3	4	1	5	1
Halamphora crenulatoides	2		2			9	8	1	1		1																1	2
Halamphora cymbifera														1										1	1	2
Halamphora kolbei																2			2	2		2					2
Halamphora lineata							1
Halamphora mosensis	2	1	4	2	4		3		6				1	2	1	5	6	12		4					2	2				4
Halamphora subtropica		16	20		9	14		26	22		26	22	8	1	8		8	1	10	14	6	12	9	22	10	6	6	12	18	29
Halamphora subturgida			4
Halamphora tenerrima	37	26	12	14	24	7	11	20	34	8		16	14	28	16	16	12	2	14	16	6	6	4		16	10	2	12	5	7
Halamphora turgida		1
Hantzschia cf. weinrechtii							1
Haslea howeana	2	2		1	2				2	5	6	6	4		4				10	6	4		2					4	4	6
Haslea spicula			2										4															1
Licmophora abbreviata	2	2													2									2	6				1
Luticola mutica						2											1										1
Madinithidium capitatum	2			30	8	27		2	8	5	2	4	2	4	4				10	12	8	14	17	12	3			2	6	2
Madinithidium flexuistriatum		2																								2				1
Madinithidium sp. 1	7			2		5							2									1								2
Mastogloia elliptica	1	1												2
Mastogloia pumila	17		9				9		4	2		2	1		2			2												1
Mastogloia pusilla	16	4	2	9			2	5	5										3	4									2	3
Melosira spp.				1			2
Minidiscus proschkinae		2		4	1	2	2	2	2	2	6		6	4	16	4	12	24	4	4	10	4	2		21	18	8	1		2
Minidiscus spp.				10	2				2	3	2		4	4	6	4		6		2	14	8	2	2	10	8	2			5
Navicula abunda										1
Navicula antverpiensis		1	7	5	2	2	8	12	1							2					2
Navicula binodulosa					1
Navicula bipustulata				4	3						2					12		3										1
Navicula cancellata				2
Navicula cf. agnita
Navicula cincta	1						2	1	2						1
Navicula consentanea				32	25	21	2		6	6	28	46	28	32	36	72	46	72	38	46	46	30	48	37	2	2	6	16	21	18
Navicula digitoradiata						1												1
Navicula dilucida	2			2						13	22	18		10	16				12	4	10	2	10	2		2		2
Navicula directa	2														2
Navicula diserta							8															2
Navicula eidrigeana																														2
Navicula erifuga																									2
Navicula fauta														2
Navicula gelida				2
Navicula gregaria					4				2																				3
Navicula halinae	14	7	49	8	5	5	43	13	27	2	4	2	2	2	10		26	2	9	6	2		2		6			6	9	26
Navicula hamiltonii	2	5		23	4	7	18	8	4	16	14	18	28	16	40				15	10	12	8	14	6	4		4	6	8	8
Navicula jonssonii	42	26	28	28	46	20	12	29	7	26	30	22	16	23	20	13		8	20	22	18	16	6	8				36	18	20
Navicula microcari				2									2															2		4
Navicula microdigitoradiata		2	1	8	2	6		2			8				1		1	2	7		1								1	1
Navicula palpebralis					1
Navicula perminuta	32	14	6	6	8	6	16	14	16	4				11	10	2	18	10	1	6	2			2		2	2	7	2	1
Navicula platyventris															4	6	9	6			4	1		4	10		2
Navicula salinarum																		2
Navicula salinicola	14	52	26	28	34	75	52	86	80	22	56	30	56	64	50	16	48	48	68	68	77	62	96	74	34	26	24	90	73	74
Navicula sieminskae	2
Navicula sp. 1		1					2		2	16	2	2							2								1
Navicula sp. 101																						2
Navicula sp. 111																		26
Navicula sp. 120										4		4		2			8	14		4	2		6	4			6		6	2
Navicula sp. 13													3						2			2
Navicula sp. 2																										2	4
Navicula sp. 36			1					2
Navicula sp. 37													2
Navicula sp. 44										2
Navicula sp. 46																			7
Navicula sp. 51	6	2	2	10	8	10		8	2		20	18		16		4	6			12	14	4	8	6	6	6	2	3	6	2
Navicula sp. 54				1
Navicula sp. 55																			2
Navicula sp. 57																													2
Navicula sp. 59					1
Navicula sp. 63		10	2	10	2	6		2			13	18		2	6	30	4		8	6	8		8	8				8		2
Navicula sp. 80
Navicula vandamii var. mertensiae																			8	6	2				2
Navicula viminoides																						1				4
Navicula willisiae	20	26	16	12		2	14	4	9		2								4	4	6	16	16	6	6	6	8	13	12	19
Nitzschia agnita																										2
Nitzschia alpina																														2
Nitzschia cf. draveillensis									4
Nitzschia cf. frigida																2
Nitzschia closterium										2
Nitzschia compressa				1																							1
Nitzschia distans var. 2					12	2	10	4		23	6	2	4	4	30		4	4	16	26	26	8	10	10	7		4		2	2
Nitzschia dubia																			1
Nitzschia frequens				2	5		4			13	20	22	16	6	16				16	10	14	1	6	10				1		1
Nitzschia frustulum			2	2	22	4		4	2	16	16	26	16		10	18	20	4	34	40	32	2	26	4	26	10	8	11	2	4
Nitzschia fusiformis																	4	6	3		4				1
Nitzschia longissima																	2	10
Nitzschia lorenziana	1		6				3	1																		4
Nitzschia microcephala	26	14	16				8	18	16																2			2	4	6
Nitzschia palea	6	8		4	1									2		2				2										2
Nitzschia paleacea	6	16	6		4				2							2						4
Nitzschia peisonis		1	1	2					2																					1
Nitzschia pellucida		6				10							2				10	16		2	4		2		10	6	4		3	2
Nitzschia pubens										2											2
Nitzschia pusilla	8	8	4	2	2	11	16	12	26	4	12	6			2				2	2	4	4	4	4	2	2		11	29	26
Nitzschia scalpelliformis			1	2		4	2	1		2									1			4	2			2	1		2
Nitzschia sigma				1																					2
Nitzschia sp. 1		6	29	2		6	14	26	2						2				8	6	10		2		4		10	16	11	27
Nitzschia sp. 3																4
Nitzschia spathulata	2			7	10	8	7			8		3	2	14	18	2			12	2	2					1		7	8	3
Nitzschia valdestriata																				2				2
Nitzschia vasta				4
Odontella aurita																	2
Olifantiella sp.1					2					2
Opephora spp.	2			4		2				2		2		2	7		6		4			8		2	24	55	94	29	44	8
Paralia sulcata				6	1					1	1								1
Parlibellus crucicola							1
Parlibellus grevilleoides						2
Parlibellus sp. 10																			2
Parlibellus sp. 9																			6
Pauliella taeniata									2
Petroneis granulata																		2
Plagiogrammopsis vanheurckii																											1
Planothidium delicatulum	2	2	5	7	15	4		11	8	13	10	10	6	10	7	5	4	5	11	7	6	12	8	15	21	17	15	8	6	6
Planothidium deperditum																					4				5	3	4
Planothidium frequentissimum		3	4			2		4	10	2			10											2						10
Planothidium lemmermannii																											2
Planothidium sp. 11			1			4	2	3		4			8	2		4			5		2	4		8	2	6	7	5	2	8
Planothidium sp.1					4
Pleurosigma gracile				1																					1
Proschkinia sp. 1																							2
Proschkinia sp. 2			6							2							2					2
Protokeelia sp.												4
Psammogramma vigoense										2
Pseudostaurosira medliniae																												6
Pseudostaurosira sp.																								2
Rhaphoneis amphiceros														1											1
Rhoiconeis sp.								2
Rhopalodia musculus				3				1			1							2								1			1
Sellaphora atomoides																				2
Seminavis pusilla				12	11	10				12	24	16	8	6	8	14	20	15		11	9	66		35	4	2		1	2	1
Seminavis robusta		1		5		1				1	5	2																	2
Serratifera spp.		1	1	8	12	10		2	2		2								4				4		90	106	74	3	6	1
Shionodiscus oestrupii										1		2
Simonsenia delongei									2						2					2	2		2
Skeletonema spp.					1			1			4			8		7	4				6	1	4			1			2
Staurophora sp.					1
Tabularia affinis																									2		10
Tabularia fasciculata	4	2	4	6	9	5	11	5	1		2	4		2	3		6		1			5	1					2	3	8
Tabularia waernii											2			2
Tetramphora cf. rhombica							1
Thalassionema nitzschioides			1	3				2	1	1	2				2			2						2				2	1
Thalassiosira angulata			1		1							1							1								2
Thalassiosira cedarkeyensis					2																					2
Thalassiosira cf. decipiens																											1
Thalassiosira cf. hendey										6
Thalassiosira excentrica																											2
Thalassiosira gravida																			9		2			1
Thalassiosira levanderi																2
Thalassiosira nordenskioeldii																						2
Thalassiosira partheneia										1
Thalassiosira tenera										2
Tryblionella apiculatum				1
Unknown naviculoid diatom									4
Unknwn raphid diatom																										4
Zygoceros attenuatum																									1

## Sheet: Title
Table S2. Diatom count data for 30 sediment samples.
Microbial eukaryotes in natural and artificial salt marsh pools
Marina Potapova, Daiana Markarian, Abigail King & Laura Aycock
